# Supplementary material
Source: publisher figshare collection journal article supplement (https://acs.figshare.com/ndownloader/files/4737724)
Supplement: Supplementary file 1 [file 4737724]

## Supporting Information for:

### Acid Rain Effects on Aluminum Mobilization Clarified by Inclusion of Strong Organic Acids

<sup>1\*</sup>Lawrence, G.B., <sup>2</sup>Sutherland, J.W., <sup>3</sup>Boylen, C.W. <sup>3</sup>Nierzwicki-Bauer, S.A., <sup>4</sup>Momen,  
<sup>1</sup>B., Baldigo, B.P., <sup>5</sup>Simonin, H.A.

Number of pages: 3

Number of tables: 2

Number of figures: 1

Table S1. Number of samples collected and median values for water chemistry measurements in the North and South Tributaries of Buck Creek from 1999-2004, October 2003 and March 2004 western Adirondack Stream Surveys (WASS) and the Winnisook Reach of the West Branch of the Neversink River from 2001-2004. All measurements in  $\mu\text{mol L}^{-1}$  except pH ( $-\log_{10} \text{H}^+$  in  $\text{mol L}^{-1}$ ) and ANC ( $\mu\text{eq L}^{-1}$ ). The analytical reporting limit for  $\text{Al}_i$  and  $\text{Al}_o$  is  $1.5 \mu\text{mol L}^{-1}$ . The analytical reporting limit for  $\text{NO}_3^-$  is  $2.0 \mu\text{mol L}^{-1}$ . Values below the reporting limits are considered approximate.

|                            | Buck Creek  |             | WASS Stream Surveys |          | Winnisook |
|----------------------------|-------------|-------------|---------------------|----------|-----------|
|                            | North Trib. | South Trib. | October 03          | March 04 |           |
| Samples collected          | 286         | 259         | 197                 | 192      | 283       |
| pH                         | 4.3         | 5.0         | 5.6                 | 5.6      | 7.7       |
| <sup>1</sup> ANC           | -48         | 1           | 20                  | 16       | -17       |
| <sup>2</sup> $\text{Al}_i$ | 6           | 4           | 2                   | 1        | 6         |
| <sup>3</sup> $\text{Al}_o$ | 9           | 2           | 4                   | 3        | 1         |
| <sup>4</sup> DOC           | 1242        | 321         | 754                 | 413      | 211       |
| $\text{SO}_4^{2-}$         | 46          | 49          | 50                  | 44       | 46        |
| $\text{NO}_3^-$            | 12          | 30          | 3                   | 33       | 20        |
| $\text{Cl}^-$              | 11          | 9           | 14                  | 8        | 11        |
| $\text{Ca}^{2+}$           | 29          | 38          | 50                  | 45       | 20        |
| $\text{Mg}^{2+}$           | 10          | 10          | 16                  | 15       | 15        |
| $\text{Na}^+$              | 25          | 27          | 27                  | 25       | 11        |
| $\text{K}^+$               | 7           | 7           | 11                  | 8        | 4         |

<sup>1</sup>Acid neutralizing capacity

<sup>2</sup>Inorganic monomeric Al

<sup>3</sup>Organic monomeric Al

<sup>4</sup>Dissolved organic carbon

Table S2. Minimum and maximum values for water chemistry measurements in the North and South Tributaries of Buck Creek from 1999-2004, October 2003 and March 2004 western Adirondack Stream Surveys (WASS) and the Winnisook Reach of the West Branch of the Neversink River from 2001-2004. All measurements in  $\mu\text{mol L}^{-1}$  except pH ( $-\log_{10} \text{H}^+$  in  $\text{mol L}^{-1}$ ) and ANC ( $\mu\text{eq L}^{-1}$ ). The analytical reporting limit for  $\text{Al}_i$  and  $\text{Al}_o$  is  $1.5 \mu\text{mol L}^{-1}$ . The analytical reporting limit for  $\text{NO}_3^-$  is  $2.0 \mu\text{mol L}^{-1}$ . Values below the reporting limits are considered approximate.

|                            | Buck Creek  |             | WASS Stream Surveys |          | Winnisook |
|----------------------------|-------------|-------------|---------------------|----------|-----------|
|                            | North Trib. | South Trib. | October 03          | March 04 |           |
| pH                         | 4.0–6.6     | 4.5–6.9     | 4.2–8.2             | 4.3–8.2  | 4.3–5.4   |
| <sup>1</sup> ANC           | -102–241    | -30–338     | -67–1918            | -53–1200 | -48–3.9   |
| <sup>2</sup> $\text{Al}_i$ | 0–22        | 0–16        | 0–15                | 0–23     | 0–15      |
| <sup>3</sup> $\text{Al}_o$ | 0–15        | 0–6         | 1–12                | 1–8      | 0–8       |
| <sup>4</sup> DOC           | 420–2310    | 59–875      | 96–2350             | 106–1047 | 84–843    |
| $\text{SO}_4^{2-}$         | 25–149      | 34–68       | 14–169              | 23–88    | 2–63      |
| $\text{NO}_3^-$            | 0–220       | 2–95        | 0–79                | 1–123    | 0–72      |
| $\text{Cl}^-$              | 3–34        | 4–24        | 5–211               | 4–219    | 4–26      |
| $\text{Ca}^{2+}$           | 9–149       | 27–123      | 12–969              | 11–586   | 9–40      |
| $\text{Mg}^{2+}$           | 3–35        | 1–35        | 5–160               | 5–147    | 7–24      |
| $\text{Na}^+$              | 4–70        | 13–93       | 12–294              | 11–283   | 6–20      |
| $\text{K}^+$               | 1–75        | 1–25        | 2–27                | 1–16     | 2–18      |

<sup>1</sup>Acid neutralizing capacity

<sup>2</sup>Inorganic monomeric Al

<sup>3</sup>Organic monomeric Al

<sup>4</sup>Dissolved organic carbon

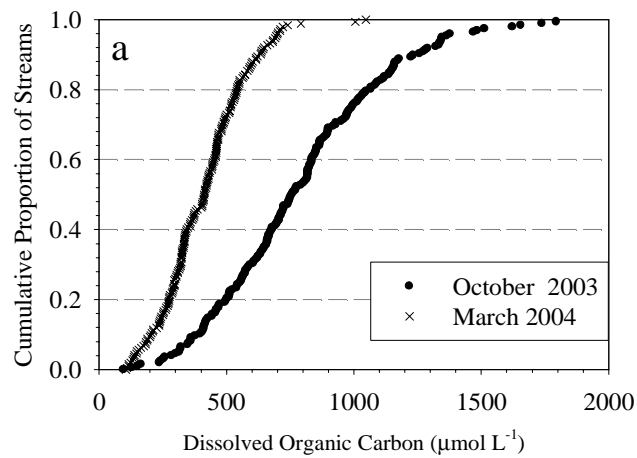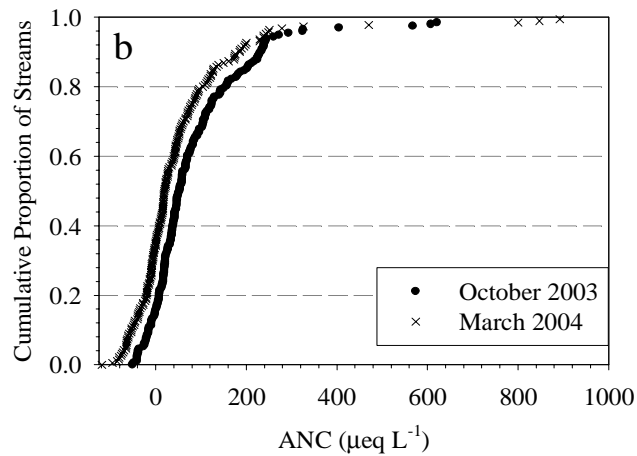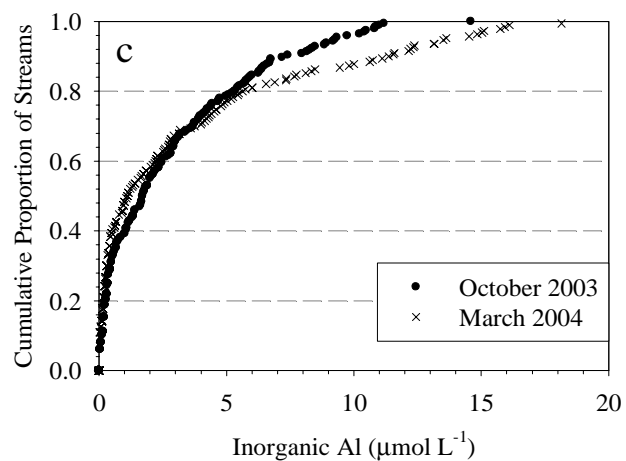

Figure S1. The cumulative proportion of DOC concentrations (a), ANC (b), and inorganic Al concentrations (c), in stream surveys conducted in October 2003 and March 2004.
